# Supplementary material for: Safety of Obtaining an Extra Biobank Kidney Biopsy Core
Source: MDPI journal article supplement (doi:10.3390/jcm11051459), 2022-03-07
Supplement: s1 [file s1]

**Supplementary Table S1:** Multivariate logistic multinomial regression analysis for independent risk factors of presenting complications after kidney biopsy.

| <b>Variable</b>                                                            | <b>OR</b> | <b>CI (95%)</b> | <b>Lateral significance (p)</b> |
|----------------------------------------------------------------------------|-----------|-----------------|---------------------------------|
| PT (seconds)*                                                              | 1.61      | 1.04-2.49       | <b>0.035</b>                    |
| Renal cores<br>(1 core vs 2/3 cores)                                       | 7.46      | 1.28-43.64      | <b>0.026</b>                    |
| Age (years)*                                                               | 1.01      | 0.98-1.03       | 0.67                            |
| Platelets (n)*                                                             | 1         | 1-1             | 0.258                           |
| Weight (Kg)*                                                               | 1.02      | 0.99-1.05       | 0.245                           |
| Hb pre (gr/dL)*                                                            | 1.05      | 0.86-1.29       | 0.625                           |
| <i>Dependent variable: Minor complications vs Absence of complications</i> |           |                 |                                 |
| PT (seconds)*                                                              | 1.06      | 0.58-1.95       | 0.857                           |
| Renal cores<br>(1 core vs 2/3 cores)                                       | 5.93      | 0.35-99.69      | 0.217                           |
| Age (years)*                                                               | 1.03      | 0.99-1.07       | 0.186                           |
| Platelets (n)*                                                             | 1         | 1-1             | 0.257                           |
| Weight (Kg)*                                                               | 1.01      | 0.96-1.06       | 0.785                           |
| Hb pre (gr/dL)*                                                            | 1.44      | 0.95-2.18       | 0.082                           |
| <i>Dependent variable: Major complications vs Absence of complications</i> |           |                 |                                 |

Dependent variable: Complications after kidney biopsy (minor complications vs major complications vs absence of complications).

*PT*: Prothrombin time, *Hb pre*: Haemoglobin level pre-KB, *CI*: Confidence Interval

\* Quantitative variables included in the multivariate logistic binary regression model.
